# Supplementary material for: Training and Competition Load in Female Basketball: A Systematic Review
Source: MDPI journal article supplement (doi:10.3390/ijerph17082639), 2020-04-12
Supplement: s1 [file s1]

## Supplementary Material

### ATTACHED FILE I. List of items

1. Atl, H., Köklü, Y., Alemdaroglu, U., & Koçak, F. Ü. (2013). A comparison of heart rate response and frequencies of technical actions between half-court and full-court 3-a-side games in high school female basketball players. *The Journal of Strength Conditioning Research* 27(2), 352-356.
2. Batalla, A., Bofill, A. M., Montoliu, R., & Corbi, F. (2018). Relationship between Heart Rate and the Scoreboard during a Relegation Playoff. *Apunts. Educació Física i Esports* (132), 110-122.
3. Conte, D., Favero, T. G., Lupo, C., Francioni, F. M., Capranica, L., & Tessitore, A. (2015). Time-motion analysis of Italian elite women's basketball games: individual and team analyses. *The Journal of Strength Conditioning Research* 29(1), 144-150.
4. Cruz, I., Pereira, L. A., Kobal, R., Kitamura, K., Cedra, C., Loturco, I., & Abad, C. C. C. (2018). Perceived training load and jumping responses following nine weeks of a competitive period in young female basketball players. *PeerJ*, 6, e5225.
5. Delextrat, A., Badiella, A., Saavedra, V., Matthew, D., Schelling, X., & Torres-Ronda, L. (2015). Match activity demands of elite Spanish female basketball players by playing position. *J International Journal of Performance Analysis in Sport*, 15(2), 687-703.
6. Herrán, A., Usabiaga, O., & Castellano, J. (2017). Comparación del perfil físico entre 3x3 y 5x5 en baloncesto formativo. *Revista Internacional de Medicina y Ciencias de la Actividad Física y el Deporte*
7. Klusemann, M. J., Pyne, D. B., Foster, C., & Drinkwater, E. J. (2012). Optimising technical skills and physical loading in small-sided basketball games. *Journal of Sports Sciences* 30(14), 1463-1471.
8. Matthew, D., & Delextrat, A. (2009). Heart rate, blood lactate concentration, and time-motion analysis of female basketball players during competition. *Journal of Sports Sciences*, 27(8), 813-821.
9. Montgomery, P. G., & Maloney, B. D. (2018). 3× 3 Basketball: Performance Characteristics and Changes During Elite Tournament Competition. *International Journal of Sports Physiology Performance* 13(10), 1349-1356.
10. Paulauskas, H., Kreivyte, R., Scanlan, A. T., Moreira, A., Siupsinskas, L., Conte, D. J. I. j. o. s. p., & performance. (2019). Monitoring workload in elite female basketball players during the in-season phase: weekly fluctuations and effect of playing time. *International Journal of Sports Physiology Performance* 14(7), 941-948.
11. Peterson, K. D., & Quiggle, G. T. (2017). Tensiomyographical responses to accelerometer loads in female collegiate basketball players. *Journal of Sports Sciences*, 35(23), 2334-2341.
12. Reina, M., Mancha, D., & Ibáñez, S. J. (2017). ¿ Se entrena como se compite? Análisis de la carga en baloncesto femenino. *Revista de Psicología del Deporte* 26(1), 9-13.
13. Reina, M., García-Rubio, J., Feu, S., & Ibáñez, S. J. (2018). Training and Competition Load Monitoring and Analysis of Women's Amateur Basketball by Playing Position: Approach Study. *Frontiers in psychology*, 9.
14. Reina, M., Mancha-Triguero, D., García-Santos, D., García-Rubio, J., & Ibáñez, S. J. (2019). Comparación de tres métodos de cuantificación de la carga de entrenamiento en baloncesto.[Comparison of three methods of quantifying the training load in basketball]. *Revista internacional de ciencias del deporte*, 15(58), 368-382.
15. Reina, M., García-Rubio, J., Pino-Ortega, J., & Ibáñez, S. J. (2019). The Acceleration and Deceleration Profiles of U-18 Women's Basketball Players during Competitive Matches. *Sports*, 7(7), 165.

16. Reina, M., García-Rubio, J., Antúnez, A., Courel-Ibáñez, J. & Ibáñez, S.J (2019). Load Variability of Training Sessions and Competition in Female Basketball. *Journal of Sport Psychology*, 28 (1), 93–99.
17. Reina, M., Rubio, J. G., Antúnez, A., & Ibáñez, S. J. (2020). Comparación de la carga interna y externa en competición oficial de 3 vs. 3 y 5 vs. 5 en baloncesto femenino (Comparison of internal and external load in official 3 vs. 3 and 5 vs. 5 female basketball competitions). *Retos. Nuevas Tendencias En Educación Física, Deporte Y Recreación*, 37(37), 400-405.
18. Sánchez-Sánchez, J., Carretero, M., Valiente, J., Gonzalo-Skok, O., Sampaio, J., & Casamichana, D. (2017). Heart rate response and technical demands of different small-sided game formats in young female basketballers.[Respuesta de la frecuencia cardíaca y demanda técnica en diferentes formatos de juegos reducidos realizados por jugadoras jóvenes de baloncesto]. *Revista internacional de ciencias del deporte*, 14(51), 55-70.
19. Sanders, G. J., Boos, B., Rhodes, J., Kollock, R. O., & Peacock, C. A. (2018). Competition-Based Heart Rate, Training Load, and Time Played Above 85% Peak Heart Rate in NCAA Division I Women's Basketball. *Journal of Strength Conditioning Research*
20. Sansone, P., Tschan, H., Foster, C., & Tessitore, A. (2018). Monitoring Training Load and Perceived Recovery in Female Basketball: Implications for Training Design. *Journal of Strength Conditioning Research*.
21. Scanlan, A. T., Dascombe, B. J., Kidcaff, A. P., Peucker, J. L., & Dalbo, V. J. (2015). Gender-specific activity demands experienced during semiprofessional basketball game play. *International Journal of Sports Physiology Performance* 10(5), 618-625.
22. Scanlan, A. T., Dascombe, B. J., Reaburn, P., & Dalbo, V. J. (2012). The physiological and activity demands experienced by Australian female basketball players during competition. *Journal of Science Medicine in Sport* 15(4), 341-347.
23. Staunton, C., Wundersitz, D., Gordon, B., Custovic, E., Stanger, J., & Kingsley, M. (2018). The effect of match schedule on accelerometry-derived exercise dose during training sessions throughout a competitive basketball season. *Sports*, 6(3), 69.
24. Staunton, C., Wundersitz, D., Gordon, B., & Kingsley, M. (2018). Accelerometry-derived relative exercise intensities in elite women's basketball. *International Journal of Sports Medicine* 39(11), 822-827.
25. Vallés-Ortega, C., Fernández-Ozcorta, E., & Fierro-Suero, S. (2017). Patrón fatiga-recuperación en una competición de alta densidad competitiva en Baloncesto Femenino Junior. *Cuadernos de Psicología del Deporte*, 17(3), 183-188.
26. Vallés-Ortega, C., Fernández-Ozcorta, E., & Suero, S. F. (2017). Relación entre la complejidad técnico-táctica en la sesión de entrenamiento y la carga interna en baloncesto femenino. *SPORT TK*, 163-168.

**Table S1.** Summary of articles

| STUDY |                         | PARTICIPANTS                                        | YEAR                     | LEVEL    | GOAL        | SAMPLE                                            | LOAD                  | INSTRUMENTS                                | VARIABLES                                                                                                                         |
|-------|-------------------------|-----------------------------------------------------|--------------------------|----------|-------------|---------------------------------------------------|-----------------------|--------------------------------------------|-----------------------------------------------------------------------------------------------------------------------------------|
| 1     | Atl et al. (2013)       | 12 female basketball players                        | U16 (15.56±05 years)     | State    | Training    | half-court and full-court 3-a-Side training games | Internal              | Heart rate band (Polar Team Sport System)  | % Heart rate peak                                                                                                                 |
| 2     | Batalla et al. (2018)   | 10 female basketball players                        | Senior (21.3±2.71 years) | State    | Competition | 10 official games                                 | Internal              | Heart rate band (Suunto Team Pack®)        | % Heart rate peak                                                                                                                 |
| 3     | Conte et al. (2015)     | 12 female basketball players                        | Senior (27±6.4 years)    | National | Competition | 5 official games                                  | External              | Video recordings (Sony HD AVCHD HDR CX115) | Activity categories (Standing/walking, jogging, running, sprinting, jumping, low, moderate and high-intensity-specific movements) |
| 4     | Cruz et al. (2018)      | 10 young female basketball players                  | U18 (17.2±0,4)           | State    | Training    | 9-weeks training                                  | Internal and external | RPE<br>TQR<br>CMJ                          |                                                                                                                                   |
| 5     | Delextrat et al. (2015) | 42 female basketball players belonging to six teams | Senior (25.9±4.3)        | National | Competition | 3 official games from each team                   | External              | Video recordings (LINCE)                   | Activity categories intensity, specific movements and static exertion.                                                            |
| 6     | Herran et al. (2017)    | 10 female basketball players                        | U16 (15 ±1.0 years)      | State    | Training    | 3x3 and 5x5 training games                        | External              | GPS ((MinimaxX v.4.0, Catapult)            | Distance, average speed, Player Load and ranges of acceleration                                                                   |

|    |                                 |                                                       |                           |               |             |                   |                       |                                                                                           |                                                                                                                                  |
|----|---------------------------------|-------------------------------------------------------|---------------------------|---------------|-------------|-------------------|-----------------------|-------------------------------------------------------------------------------------------|----------------------------------------------------------------------------------------------------------------------------------|
| 7  | <b>Klusemann et al. (2012)</b>  | 16 female basketball players                          | U18 (17.4±0.7 years)      | National      | Training    | 19 training games | Internal              | Heart rate band (Suunto™)<br>RPE<br>Video recordings (SportsCodeElite)                    | %Heart rate peak, percentage of time spent in Zone 4 and Zone 5.<br>Technical events.<br>Subjective load                         |
| 8  | <b>Matthew et al. (2009)</b>    | 9 female basketball players                           | Senior (25.8±2.5 years)   | National      | Competition | 9 official games  | Internal and external | Heart rate band (Polar S810)<br>Video recordings (VC-x400)<br>Blood samples (Analox LM5)  | Time motion analysis (jumps, sprints, activity demands, intensity), heart rate average and 85% of heart rate peak, blood lactate |
| 9  | <b>Montgomery et al. (2018)</b> | 201 female basketball players in 3x3 competition      | Senior (22.9 ± 5.6 years) | International | Competition | 3x3 tournament    | Internal and external | GPS and heart rate band (OptimEye S5, Catapult)<br>Blood samples (Lactate Scout™),<br>RPE | CoD, accelerations and decelerations, jumps, PlayerLoad, Blood Lactate, Heart rate peak and average.                             |
| 10 | <b>Paulauskas et al. (2019)</b> | 29 female basketball players belonging to seven teams | Senior (21 ± 5 years)     | National      | Training    | 24-weeks training | Internal and external | RPE and Duration (minutes).                                                               | Total weekly TL, weekly TL, weekly GL, chronic workload, training monotony                                                       |
| 11 | <b>Peterson et al. (2017)</b>   | 5 female basketball players                           | Senior (20 ± 1.0 years)   | National      | Training    | 20-weeks training | External              | Inertial devices (Catapult Optimeye S5) and TMG                                           | Player Load™, IMA™, Tc, and Dm.                                                                                                  |

|    |                      |                                           |                          |       |                          |                                               |                       |                                                                |                                                                                                                                                                           |
|----|----------------------|-------------------------------------------|--------------------------|-------|--------------------------|-----------------------------------------------|-----------------------|----------------------------------------------------------------|---------------------------------------------------------------------------------------------------------------------------------------------------------------------------|
|    |                      |                                           |                          |       |                          |                                               |                       | assessments (TMG-BMC d. o.o., Ljubljana, Slovenia)             |                                                                                                                                                                           |
| 12 | Reina et al. (2017)  | 10 female basketball players              | Senior (21.7±3.65 years) | State | Training and competition | 8 official games and 22 training sessions     | Internal and external | Heart rate band (Garmin™) and inertial device (Wimu™)          | Heart rate peak and average. Impacts, Steps and Jumps per minute                                                                                                          |
| 13 | Reina et al. (2018)  | 10 female basketball players              | Senior (21.7±3.65 years) | State | Training and competition | 8 official games and 47 5 vs.5 training tasks | Internal and external | Heart rate band (Garmin™) and inertial device (Wimu™)          | Heart rate peak and average, % Heart rate peak and work zones. Number of Impacts, Steps, Jumps and Player Load                                                            |
| 14 | Reina et al. (2019)a | 10 female basketball players              | Senior (21.7±3.65 years) | State | Training                 | 22 training sessions (120 tasks)              | Internal and external | Heart rate band (Garmin™) and inertial device (Wimu™)<br>SIATE | % Heart rate peak, PlayerLoad, subjective load                                                                                                                            |
| 15 | Reia et al. (2019)b  | 48 female players belonging to four teams | U18                      | State | Competition              | 12 official games                             | External              | Inertial device and Ultra Wided Band (Wimu™)                   | Number of accelerations and decelerations. Duration (ms), Start speed (km/h) and Acceleration peak (m/s <sup>2</sup> ) of each one. Intensity ranges (m/s <sup>2</sup> ). |

|    |                               |                                 |                         |                |                          |                                                                |                       |                                                       |                                                                                                              |
|----|-------------------------------|---------------------------------|-------------------------|----------------|--------------------------|----------------------------------------------------------------|-----------------------|-------------------------------------------------------|--------------------------------------------------------------------------------------------------------------|
| 16 | Reina et al. (2019)c          | 12 female basketball players    | U15                     | State          | Training and competition | 8 official games and 35 training sessions                      | External              | Inertial device (Wimu™)                               | Player Load                                                                                                  |
| 17 | Reina et al. (2020)           | 10/ 8 female basketball players | Senior / U18            | State/National | Competition              | 8 official games (5x5) / 6 official games (3x3)                | Internal and external | Heart rate band (Garmin™) and inertial device (Wimu™) | Heart rate peak and average, % Heart rate peak and work zones. Number of steps, jumps and impacts per minute |
| 18 | Sanchez-Sanchez et al. (2017) | 6 female basketball players     | U15 (14.3 ± 0.5 years)  | State          | Training                 | 2 training sessions                                            | Internal              | Heart rate band (Polar Team System 2) YOYO test       | Heart rate peak and average, % Heart rate peak                                                               |
| 19 | Sanders et al. (2018)         | 10 female basketball players    | Senior (19.8±1.3 years) | National       | Competition              | 31 official games                                              | Internal              | Heart rate band (Polar Global)                        | Heart rate peak and average, % Heart rate peak and work zones.                                               |
| 20 | Sansone et al. (2018)         | 13 female players               | Senior (22.6±3 years)   | National       | Training and competition | 40 training sessions, 2 friendly games and 12 official games . | Internal              | RPE and TQR scales                                    |                                                                                                              |
| 21 | Scanlan et al. (2015)         | 12 female basketball players    | Senior (21.2 ± 3.1)     | National       | Competition              | 3 official games                                               | External              | Video recordings (Basler A602FC)                      | Activity frequencies, durations, and distances                                                               |

|    |                         |                              |                         |          |             |                                           |                       |                                                                                                                   |                                                                                                                      |
|----|-------------------------|------------------------------|-------------------------|----------|-------------|-------------------------------------------|-----------------------|-------------------------------------------------------------------------------------------------------------------|----------------------------------------------------------------------------------------------------------------------|
| 22 | Scanlan et al. (2012)   | 12 female basketball players | Senior (22.0±3.7 years) | State    | Competition | 8 official matches                        | Internal and external | Heart rate band (Polar Electro)<br>Video recordings (Basler A602FC)<br>Blood samples (Accusport Lactate Analyser) | Activity frequencies, total durations and total distances, heart rate average, % heart rate peak, blood lactate.     |
| 23 | Staunton et al. (2018)a | 10 female basketball players | Senior (27 ± 5 years)   | National | Competition | 18 official games                         | Internal and external | Tri-axial accelerometer (Link).<br>Respiratory parameters (Oxycon Mobile)                                         | Peak VO <sub>2</sub> ; duration (%) spent in each intensity zone; Frequency, average bout duration and maximum bout. |
| 24 | Staunton et al. (2018)b | 9 female basketball players  | Senior (27 ± 5 years)   | National | Training    | 6-weeks training with 3 sessions per week | Internal and external | Accelerometer (ActiLife)<br>VO <sub>2</sub> (LabVIEW)                                                             | Total duration (%) spent in each intensity zone. Exercise dose (Impulse) for easy, medium, and hard match schedules  |
| 25 | Vallés et al. (2017)a   | 12 female basketvall players | U18 (17.08±0.67)        | State    | Competition | 6 official games                          | Internal and external | Borg<br>TQR<br>Wellness<br>Minutes<br>CMJ                                                                         |                                                                                                                      |

|    |                       |                              |                  |       |          |                                        |                       |                               |
|----|-----------------------|------------------------------|------------------|-------|----------|----------------------------------------|-----------------------|-------------------------------|
| 26 | Vallés et al. (2017)b | 12 female basketball players | U18 (17.08±0.67) | State | Training | Training sessions through championship | Internal and external | Borg TQR Wellness Minutes CMJ |
|----|-----------------------|------------------------------|------------------|-------|----------|----------------------------------------|-----------------------|-------------------------------|
